# Supplementary material
Source: ML conference proceedings conference paper supplement (https://openreview.net/forum?id=Jbe9AVsYS6)
Supplement: supplementary_material [file attachment]

The appendix is included in the main submission file. No other supplementary files are included.
